# Supplementary figures and images for: Interhemispherically dynamic representation of an eye movement-related activity in mouse frontal cortex
Source: eLife journal article supplement (doi:10.7554/elife.50855), 2019-11-05

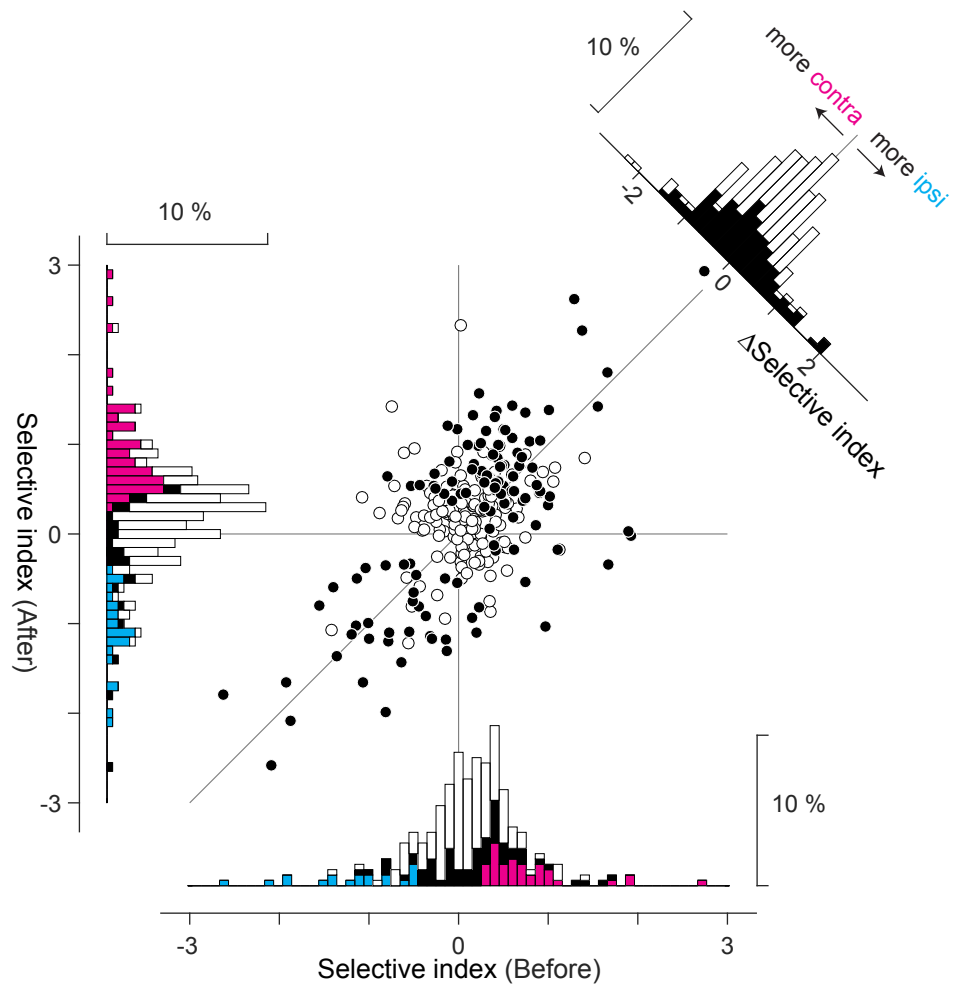

Supplement: supp [file elife-50855-supp-v1.zip]
